# Supplementary material
Source: publisher figshare collection journal article supplement (https://frontiersin.figshare.com/ndownloader/files/12280091)
Supplement: Supplementary file [file 12280091]

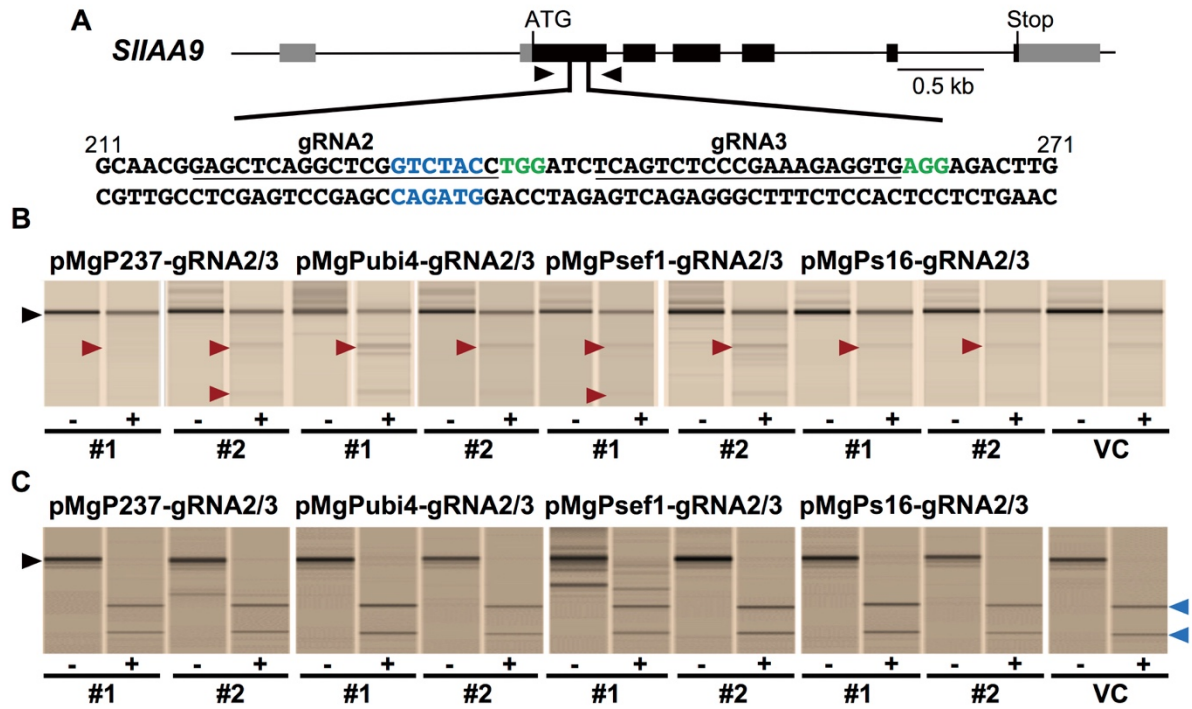

**Supplementary Fig. 2. Mutation analyses of *SIIAA9*-gRNA2 and *SIIAA9*-gRNA3 sites by Cel-1 assay and PCR-RFLP**

(A) The gRNA target sites and primer sites for *SIIAA9*-gRNA2 and *SIIAA9*-gRNA3 in the *SIIAA9* gene. Black arrowheads present primers used to amplify the 350 bp fragments including *SIIAA9*-gRNA2 and *SIIAA9*-gRNA3 target sites. Blue characters are recognition sites of *AccI*.

(B) Mutation analysis of *SIIAA9*-gRNA2 and *SIIAA9*-gRNA3 sites by Cel-1 assay. Black arrowheads indicate the untreated or non-mutation fragments (350 bp), and red arrowheads indicate the digested fragments (230 bp and 120 bp) by Cel-1 nuclease.

(C) Mutation analysis of *SIIAA9*-gRNA2 sites by PCR-RFLP. Black arrowheads indicate untreated or mutation fragments (350 bp), and blue arrowheads indicate the digested fragments (210 bp and 140 bp) by *AccI* in *SIIAA9*-gRNA2 sites. -; untreated PCR products. +; treated with Cel-1 nuclease or *AccI*. VC; vector control tomato plants harboring the empty vector. The numbers indicate the tomato calli lines.
